# Supplementary material for: Naïve CD8+ T cell derived tumor-specific cytotoxic effectors as a potential remedy for overcoming TGF-β immunosuppression in the tumor microenvironment
Source: PubMed Central journal article supplement (PMC4910083; doi:10.1038/srep28208), 2016-06-16

**Naïve CD8+ T cell derived tumor-specific cytotoxic effectors as a potential remedy for overcoming TGF- $\beta$  immunosuppression in the tumor microenvironment**

Hong Hanh Nguyen<sup>1</sup>, Therasa Kim<sup>2</sup>, Sang Yun Song<sup>3</sup>, Somang Park<sup>1</sup>, Hyang Hee Cho<sup>1</sup>, Sung-Hoon Jung<sup>4</sup>, Jae-Sook Ahn<sup>4</sup>, Hyeoung-Joon Kim<sup>4</sup>, Je-Jung Lee<sup>1,4</sup>, Hee-Ok Kim<sup>5</sup>, Jae-Ho Cho<sup>5</sup> and Deok-Hwan Yang<sup>1,4</sup>

*<sup>1</sup>Research Center for Cancer Immunotherapy, <sup>2</sup>Department of Medical Sciences, <sup>3</sup>Department of Thoracic and Cardiovascular Surgery, <sup>4</sup>Department of Hematology-Oncology, Chonnam National University Hwasun Hospital, Hwasun, Jeollanam-do, Republic of Korea; and <sup>5</sup>Academy of Immunology & Microbiology (AIM), Institute for Basic Science (IBS), Pohang, Republic of Korea*

**Supplementary Figure S1.** Proliferation assay of high-dose IL-2 (1  $\mu\text{g}/\text{mL}$ ) primed human naïve  $\text{CD8}^+$  T cells. CFSE analyses at various time points showed adequate peak expansion starting at 7 days post high-dose IL-2 stimulation.

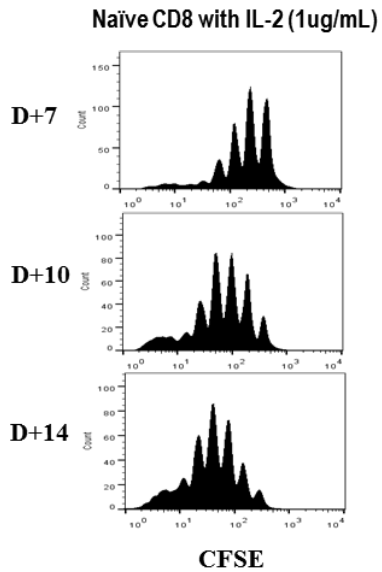

**Supplementary Figure S2.** Expression of PD-L1 and E-Cadherin in different tumor cell lines. The U266 cell line was chosen as target cells for cytotoxic assays based on its expression of E-Cadherin and PD-L1

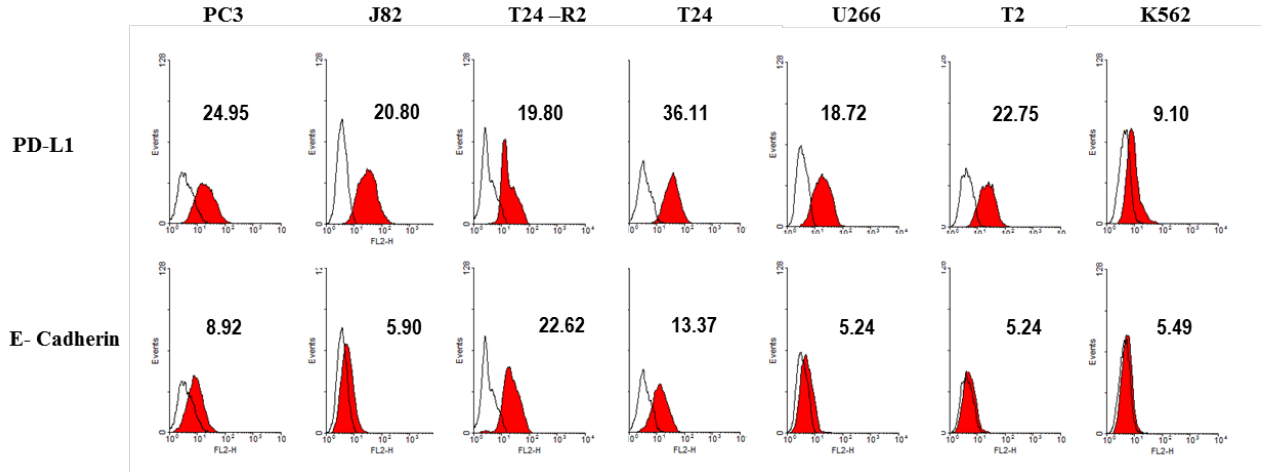

Supplement: srep28208-s1.pdf [file srep28208-s1.pdf]
